1 **Cross-feeding between *Thauera aminoaromatica* and *Rhodococcus***  
2 ***pyridinivorans* drove quinoline biodegradation in a denitrifying**  
3 **bioreactor**

4

5 Xinxin Wu, Xiaogang Wu, Ji Li, Qiaoyu Wu, Yiming Ma, Weikang Sui, Liping Zhao,  
6 Xiaojun Zhang\*

7

8 State Key Laboratory of Microbial Metabolism, Joint International Research  
9 Laboratory of Metabolic & Developmental Sciences, and School of Life Sciences &  
10 Biotechnology, Shanghai Jiao Tong University, Shanghai, 200240, China

11

12 **Running title:** Syntrophic denitrifying degradation of quinoline

13

14 \* Corresponding author: Dr. Xiaojun Zhang,

15 Tel: +86 21 34204878, E-mail: xjzhang68@sjtu.edu.cn

16 800 Dongchuan Road, Minhang District, Shanghai, 200240, China

17

## 18 **Abstract**

19       The complex bacterial community is predominated by several taxa, such as  
20 *Thauera* and *Rhodococcus*, in a quinoline-degrading denitrifying bioreactor. Yet it  
21 remains unclear about how the interactions between the different bacteria mediate the  
22 quinoline metabolism in denitrifying condition. In this study, we designed a  
23 sequence-specific amplification to guide the isolation of the most predominant  
24 bacteria and obtained four strains of *Thauera aminoaromatica*, the representative of  
25 one key member in the bioreactor. Test on these isolates demonstrated that all of them  
26 were unable to thrive on quinoline but could efficiently degrade 2-hydroxyquinoline,  
27 the hypothesized primary intermediate of quinoline catabolism, under nitrate-reducing  
28 condition. However, another isolate, *Rhodococcus pyridinivorans* YF3, corresponding  
29 to the second abundant taxon in the same bioreactor, was found to degrade quinoline  
30 via 2-hydroxyquinoline. The end products and removal rate of quinoline by isolate  
31 YF3 were largely varied with the quantity of available oxygen. Specifically, quinoline  
32 could only be converted into 2-hydroxyquinoline without further transformation under  
33 the condition with insufficient oxygen, e.g. less than 0.5% initial oxygen in the vials.  
34 However, if were aerobically pre-cultured in the medium with quinoline the resting  
35 cells of YF3 could anaerobically convert quinoline into 2-hydroxyquinoline. A  
36 two-strain consortium constructed with isolates from *Thauera* (R2) and *Rhodococcus*  
37 (YF3) demonstrated an efficient denitrifying degradation of quinoline. Thus, we  
38 experimentally proved that the metabolism interaction based on the  
39 2-hydroxyquinoline cross-feeding between two predominant bacteria constituted the  
40 mainstream of quinoline degradation. This work sheds light on the understanding of  
41 mechanism of quinoline removal in the denitrifying bioreactor.

42

43 **Keywords:** Quinoline-degrading bioreactor, 2-hydroxyquinoline, microbial  
44 interaction, cross-feeding, oxygen, denitrification

45

## 46 **Importance**

47 We experimentally verified the most predominant *Thauera* sp. was indeed active  
48 degrader for the intermediate metabolites and the second abundant taxon  
49 *Rhodococcus* exerted, however, key function for opening the food box for a complex  
50 quinoline-degrading community. An ecological guild composed of two isolates was  
51 assembled, revealing the different roles of keystone organisms in the microbial  
52 community. This study, to our best knowledge, is the first report on the cross feeding  
53 between the initial attacker with unprofitable catalysis of reluctant heterocyclic  
54 compounds and the second bacterium which then completely degrades the compound  
55 transformed by the first bacterium. These results could be a significant step forward  
56 towards elucidation of microbial mechanism for quinoline denitrifying degradation.

57

## 58 **Introduction**

59 Quinoline and its derivatives are typical N-heterocyclic compounds that occur  
60 widely in coal tar, shale oil and creosote, and serve as raw materials and solvents in  
61 chemical, pharmaceutical and pesticide industries (1). They are known to be  
62 carcinogenic and mutagenic to human (2,3) and aroused a significant concern as  
63 recalcitrant pollutants to ecological environment.

64 Anaerobic bioremediation is an attractive technology due to its virtue of energy  
65 saving and cost-effectiveness, since heavily contaminated environments are often  
66 oxygen deficient (4). However, most of the literatures focused the aerobic degradation  
67 of quinoline. Various microorganisms capable of metabolizing quinoline aerobically  
68 have been isolated, mostly belonging to *Pseudomonas* (5-7), *Rhodococcus* (8) and  
69 *Bacillus* (9). The pathways of aerobic quinoline degradation have also been well  
70 described (10). However, little attention was paid to the anaerobic quinoline  
71 biodegradation. Degradation of quinoline in industrial scale wastewater treatment  
72 reactors had been reported in a few literature (11,12). In addition, no evidence proved  
73 the role of main anaerobic degraders in these industrial bioreactors. There were  
74 several efforts to elucidate the anaerobic degraders by using the lab scale bioreactor

75 and batch culture experiments (13-16). But to date, only one isolate,  
76 *Desulfobacterium indolicum* strain DSM 3383, which used sulfate as electron  
77 acceptor, was purely cultured as an anaerobic quinoline degrader (17). It is wrapped in  
78 mystery why there is few isolate for anaerobic quinoline degradation.

79 An efficient anoxic microbial community was enriched in a chemostat that was  
80 operated for more than 10 years with quinoline as electron donor and nitrate as  
81 electron acceptor. Phylogenetic analysis of this consortium showed that specific  
82 phylotypes were associated with different stages of the degradation (16), which  
83 suggests that microorganisms interact during quinoline metabolism. However, our  
84 understanding of this interaction is restricted due to the complexity of the community  
85 composition in the bioreactor while lack of anaerobic degrading microorganisms  
86 available in pure culture. Therefore, functional analysis using the representative  
87 isolates would be a crucial further step for understanding the quinoline denitrifying  
88 degradation in the reactor.

89 To investigate the underlying microbial processes in this complex  
90 quinoline-degrading consortium, we endeavored to isolate the most predominant and  
91 active bacteria, which had been identified as the keystone organisms involved in  
92 denitrifying quinoline removal (16,18). The degradation characteristics of these  
93 isolates were evaluated under different conditions. Based on the degradation function  
94 of different isolates, a co-culture of representative isolates of *Thauera* and  
95 *Rhodococcus* were constructed to demonstrate the cooperation of two bacteria during  
96 quinoline metabolism under defined conditions.

97

## 98 **Materials and methods**

### 99 **Operation of the quinoline denitrifying bioreactor**

100 A 2-L tank, filled with plastic rings and synthetic fiber strings as semisoft media,  
101 was used to construct a lab-scale bioreactor. Seeding sludge was collected from an  
102 anoxic tank of a coking wastewater treatment plant from the Shanghai Coking and  
103 Chemical Factory (Wujing, Shanghai). The synthetic wastewater was composed of

104 quinoline (100 mg/L), NaNO<sub>3</sub> (240 mg/L) and K<sub>2</sub>HPO<sub>4</sub> (140 mg/L). During  
105 wastewater upflowing (i.e. from the bottom to up) without any agitation, the inner of  
106 reactor was oxygen-depleted due to the rapid consumption by aerobic bacteria. The  
107 hydraulic retention time was 24 h. The pH and temperature of the reactor were  
108 adjusted and controlled at 7.5 and 25 °C, respectively.

### 109 **Profiling of the quinoline-degrading bacterial community**

110 The biofilm sample was collected by scraping the biofilm from the surface of the  
111 supporting materials in the bioreactor. Genomic DNA extraction of the samples in  
112 triplicate was conducted as previously described (19). The sequencing library of  
113 V3-V4 regions in the 16S rRNA gene were constructed by two-step PCR  
114 amplification according to Illumina's instructions. The purified amplicons were  
115 sequenced using the Illumina MiSeq System (Illumina Inc., United States). The  
116 preliminary process of the raw sequencing data was conducted as the previous  
117 document (20). Sequence assembly was first implemented, and the unique sequences  
118 obtained by dereplication were sorted by decreasing abundance, and then singletons  
119 were abandoned. UPARSE's default (21) was used to select the representative  
120 operational taxonomy units (OTUs), and UCHIME (22) was selected to further  
121 perform reference-based chimera detection against the RDP classifier training  
122 database (23). Finally, the OTU table was completed by mapping quality-filtered  
123 reads to the representative OTUs with Usearch (24), resulting in a global alignment  
124 algorithm at a 97% cutoff. Further analysis was performed using the QIIME platform  
125 (version 1.8)( 25). In addition, representative sequences for each OTU were submitted  
126 to the online RDP classifier (RDP database version 2.11) to determine the phylogeny,  
127 with a bootstrap cutoff of 80%. The 16S rRNA gene sequences in this study were  
128 submitted to the GenBank Sequence Read Archive (SRA) database in the National  
129 Center for Biotechnology Information (NCBI) under the accession number  
130 SRP188486.

### 131 **Isolation and identification of the most predominant bacteria**

132 Six types of media were used to isolate the most predominant *Thauera* spp.  
133 strains. The composition of the six media were described as follows, Nutrient Agar

134 (NA): peptone 10 g/L, beef extract 3 g/L, NaCl 5 g/L, agar 15 g/L (26); 1/10 strength  
135 NA: diluted by 10 folds based on NA except for the content of agar; Tryptic Soy Agar  
136 (TSA): tryptone 17 g/L, soy peptone 3 g/L, glucose 2.5 g/L, NaCl 5 g/L, K<sub>2</sub>HPO<sub>4</sub> 2.5  
137 g/L, agar 15 g/L (27); 1/10 strength TSA: diluted by 10 folds based on TSA except for  
138 the content of agar; Reasoner's 2A agar (R2A): yeast extract 0.5 g/L, peptone 0.5 g/L,  
139 casein hydrolysate 0.5 g/L, glucose 0.5 g/L, soluble starch 0.5 g/L, KH<sub>2</sub>PO<sub>4</sub> 0.3 g/L,  
140 MgSO<sub>4</sub> 0.024 g/L, sodium pyruvate 0.3 g/L, agar 15 g/L (27); Waste Water Medium  
141 (WWM): made by raw wastewater which was filtrated and removed bacteria and  
142 supplemented with 1.5% agar.

143 The specific PCR primer targeted the most predominant *Thauera* sp. was  
144 designed by DNAMAN (version 7.0) using the sequences of different OTUs  
145 belonging to genus *Thauera*, which obtained from a full length 16S rRNA clone  
146 library constructed for quinoline denitrifying bioreactor (18). OTU specific primers  
147 were used to assist the screening of the target *Thauera* strains following the  
148 previously described procedure (13).

149 The biofilm sample was obtained and mixed in a shaker with 150 rpm for 2 h.  
150 Then the suspension was diluted and spread on the plate of six types of media  
151 including NA, 1/10 strength NA, TSA, 1/10 strength TSA, R<sub>2</sub>A and WWM. All plates  
152 were incubated at 30 °C under aerobic and anaerobic conditions, respectively. The  
153 isolates that had positive signal of colony PCR were purified by plate-streaking  
154 technology. Finally, genomic DNA of all isolates were extracted by  
155 phenol-chloroform protocol (28). The ERIC-PCR was conducted to have genomic  
156 typing of all isolates (29). And representative strains for different type of ERIC  
157 fingerprints were selected for 16S rRNA gene sequencing to identify the taxonomy  
158 and construct phylogenetic tree. The 16S rRNA gene sequences of representative  
159 strains were deposited in GenBank with the accession numbers of MK271352 (R2),  
160 MK272943 (R4), MK272944 (N15), MK272945 (N38), respectively.

#### 161 **Pre-culture of bacterial inoculum for biodegradation experiment**

162 Unless specific mention, the inoculum for all experiments was prepared by  
163 inoculating the strains of *Thauera* spp. or *Rhodococcus pyridinivorans* YF3

164 (GU143680.1) in the Nutrient Broth medium (NB) and incubating at 30 °C, and 150  
165 rpm on a rotary shaker for 24 h. The bacterial cells were harvested by centrifugation  
166 and washed three times in mineral salt medium (MSM) and the suspension was used  
167 as inoculum. The mineral salt medium (MSM) contained: K<sub>2</sub>HPO<sub>4</sub>·3H<sub>2</sub>O 0.57 g/L,  
168 KH<sub>2</sub>PO<sub>4</sub> 0.233 g/L, NH<sub>4</sub>Cl 0.02675 g/L, NaCl 0.5 g/L, NaNO<sub>3</sub> 85 mg/L (1mM) and  
169 trace elements including NaHCO<sub>3</sub> 0.168 g/L, MgSO<sub>4</sub> 0.12 g/L, CaCl<sub>2</sub> 0.0544 g/L,  
170 disodium EDTA 0.025 g/L, H<sub>3</sub>BO<sub>3</sub> 0.0036 g/L, FeSO<sub>4</sub>·7H<sub>2</sub>O 0.0015 g/L, CoCl<sub>2</sub>  
171 0.0012 g/L, Ni(NH<sub>4</sub>)<sub>2</sub>(SO<sub>4</sub>)<sub>2</sub> 0.0012 g/L, Na<sub>2</sub>MoO<sub>4</sub> 0.00094 g/L, Na<sub>2</sub>SeO<sub>4</sub> 0.00026  
172 g/L, MnSO<sub>4</sub> 0.0002 g/L, ZnSO<sub>4</sub> 0.00016 g/L, CuSO<sub>4</sub> 0.000032 g/L, pH 7.4.

### 173 **Degradation experiments for bacterial isolates**

174 The batch experiments were conducted using a series of 20 mL headspace vials,  
175 which contained 10 mL of either the MMQ or MMHQ medium. The composition of  
176 the MMQ or MMHQ were described as follows. MMQ: mineral salt medium (MSM)  
177 supplemented with 0.23 mM Quinoline (Sigma–Aldrich, Co., Inc); MMHQ: mineral  
178 salt medium (MSM) supplemented with 0.23 mM 2-hydroxyquinoline  
179 (Sigma-Aldrich, Co., Inc).

180 The inoculum was 5% to 10% of volumetric proportion. For each of the different  
181 media, vials without inoculum but maintained under the same condition were set as  
182 the abiotic negative control. All vials were immediately sealed with airtight  
183 butyl-rubber septa and aluminum crimp caps and made anoxic by repeated evacuation  
184 and filling with helium. To investigate the effects of pH value on the degradation, the  
185 initial pH of media was adjusted to 4.5, 6.5, 7.5, 8.5 and 10.5, respectively.

186 To investigate the effects of oxygen on quinoline biotransformation by  
187 *Rhodococcus* sp. YF3, 0.04 mL, 0.10 mL and 0.16 mL pure oxygen were respectively  
188 injected into the vials by precision syringes, named as the groups of 0.2% O<sub>2</sub>, 0.5%  
189 O<sub>2</sub>, 0.8% O<sub>2</sub>, respectively. The headspace of anaerobic vials was no oxygen injection  
190 while the headspace of aerobic vials was replaced by air. All vials were incubated in  
191 the dark at 30 °C with shaking at 150 rpm. Samples were taken periodically by  
192 syringes in anaerobic workstation to prevent from oxygen during incubation. All  
193 treatments in the above degradation experiment had triplicates to minimize the



194 experimental variation.

## 195 **Measurement of chemical compounds**

196 The sampled liquid was centrifuged and the supernatant was used for further  
197 analysis. The concentration of quinoline and 2-hydroxyquinoline were analyzed by  
198 HPLC system (Agilent, ZORBAX SB-C18 reverse-phase column, 150 × 4.6 mm,  
199 5µm). The mobile phase was methanol solution with a volume ratio of 60:40  
200 (methanol / water) at a flow rate of 1.0 mL/min. Quinoline and 2-hydroxyquinoline  
201 were both detected at 225 nm wavelength. The injection volume was 20 µL and  
202 column temperature was at 30 °C. The nitrate concentration was measured using a  
203 PXJ-1B ion meter (Jiangfen, China) with a pNO<sub>3</sub><sup>-1</sup> nitrate ion-selective electrode  
204 (Tianci, Shanghai).

205

## 206 **Results**

### 207 **Profiling of the quinoline-degrading bacterial community**

208 The removal rates of quinoline and nitrate maintained stably at about 80% and  
209 90%, respectively, in the denitrifying quinoline-degrading bioreactor. Before sample  
210 collection for isolating the most predominant organisms, the bacterial community of  
211 triplicate samples from the reactor was profiled by high-throughput sequencing. The  
212 Illumina Miseq platform yielded 73902 high-quality reads with an average of 24634  
213 reads per sample (±1418 SD). 460 species-level operational taxonomic units (OTUs)  
214 were delineated using 97% identity as cut-off value. Six predominant OTUs  
215 contributed to 52.06% of all reads (Fig. 1). The most predominant OTU (OTU1) with  
216 relative abundance of 22.5% belonged to genus *Thauera*; while OTU2, the second  
217 abundant OTU (12.5%), was affiliated to genus *Rhodococcus*.

### 218 **Isolation and identification of the most predominant bacteria**

219 Since that the most predominant OTU was supposed as the key player for the  
220 quinoline degradation, we attempted to isolate the corresponding bacteria from the  
221 bioreactor using sequence-guiding isolation strategy. The specific PCR primers based  
222 on most predominant *Thauera* sp. were designed in silico. After selection based on the



223 amplification, the primer pair of Thau135/Thau716  
224 (5'-GGGATAACGTAGCGAAAGCT-3'; 5'-CCATCGGTGTTTCCTCCTG-3') was  
225 further evaluated experimentally for its specificity. The amplicon of reactor sample by  
226 using the selected primer pair was cloned and 15 clones were randomly selected for  
227 sequencing of partial 16S rRNA gene with length longer than 500 bp. Among them, 8  
228 clones showed 100% identity with DR-80 and most predominant OTU1, and the other  
229 5 clones shared over 99.7% identity with DR-80/OTU1, only 2 clones showed identity  
230 about 99.5%. These results indicated that the specificity of Thau135/Thau716 was  
231 high enough to guide the following isolation.

232 Several hundreds of colonies grown on the plates of six different media were  
233 screened by specific amplification using the primers of Thau135/Thau716. Totally, 13  
234 positive colonies were picked, of which 3 were purified from R2A medium, 6 from  
235 1/10 strength TSA and 4 from 1/10 strength NA medium. Morphologically, these  
236 selected colonies were pearl-like on the 1/10 NA plate and the cells formed  
237 characteristic flocs or clusters in NB liquid culture shaking with 150 rpm at 30 °C. All  
238 of these isolates were classified into four genotypes by ERIC-PCR result, in which the  
239 isolates of R2, R4, N15 and N38 were selected as the representative strains for each  
240 ERIC type. The full length of 16S rRNA gene sequences of four representative strains  
241 were 100% identity with each other and had one nucleotide mismatch with the  
242 uncultured *Thauera* clone DR-80, which had highest abundance in a lab scale  
243 bioreactor for quinoline degradation (18). Besides, all isolates showed 100% identity  
244 with the 16S rRNA gene sequence of the most predominant *Thauera* genome which  
245 was assembled using the metagenome data for the same bioreactor in our previous  
246 work (30). Moreover, *Thauera aminoaromatica* strain S2 was the closest neighbor of  
247 all isolates when blast 16S rRNA gene sequences with NCBI nr database (Fig. 2),  
248 which was consistent with the previous report about the metagenome data that the  
249 assembled genome of the most predominant organism in the reactor was most closely  
250 related to *Thauera aminoaromatica* S2 (30). These four isolates phylogenetically  
251 discriminated with other three isolates, 3-35, Q4, Q20-C, which were obtained  
252 previously from a quinoline containing coking wastewater denitrifying treatment

253 bioreactor from which the seeding sludge for our bioreactor was obtained (14).

#### 254 **Metabolism of Quinoline and 2-hydroxyquinoline by *Thauera* isolates**

255 Firstly, the isolated *Thauera* strains were tested for their capacity of quinoline  
256 degradation. Unexpectedly, none of them could metabolize quinoline, when it was  
257 used as sole carbon source, both under anaerobic and aerobic conditions. However, all  
258 four isolates could utilize 2-hydroxyquinoline, the derivative of quinoline, which was  
259 reported as the first degrading intermediate of quinoline (31). Data showed that about  
260 80% of 50 mg/L 2-hydroxyquinoline was eliminated in MMHQ medium within 10  
261 days under nitrate-reducing condition and no any accumulation of intermediates in the  
262 measured samples (Fig. 3a). The effects of pH value on 2-hydroxyquinoline  
263 degradation were further investigated. The results showed that 30 mg/L  
264 2-hydroxyquinoline was depleted in 132 h both under pH 7.5 and 8.5 conditions (Fig.  
265 3b). Degradation of substrates was apparently inhibited under acidic ( $\text{pH} \leq 6.5$ ) or  
266 alkaline ( $\text{pH} \geq 10.5$ ) condition. The transformation of 2-hydroxyquinoline was  
267 pH-dependent, with the optimal pH range from 7.5 to 8.5. Additionally, although all  
268 isolates had capacity for 2-hydroxyquinoline removal, their rates for degradation were  
269 different. For example, the isolate N38 had the lowest rate, whereas the isolate R2 had  
270 the highest rate of 0.583 mg/L.h.

#### 271 **Metabolism of quinoline by a *Rhodococcus* isolate**

272 On the petri dish for bacteria isolation, a type of reddish colony frequently  
273 appeared. The identification by 16S rRNA gene suggested it represented another  
274 predominant bacterial phylotype for quinoline degradation proposed in previous  
275 literature (16). The isolate YF3 was selected as the representative of the most  
276 predominant *Rhodococcus* OTU, which was identified as *Rhodococcus pyridinivorans*.  
277 Transformation of quinoline by YF3 under different amount of initial oxygen in  
278 headspace of vials was explored. We found that the quinoline removal rate and  
279 transformed products were varied due to the different condition of oxygen supplement.  
280 After 24 h incubation, the degradation of microcosms which inoculated with the  
281 inoculum grown on NB medium was analyzed. The results showed that 0.23 mM  
282 quinoline was completely oxidized when supplemented with sufficient oxygen; in

283 contrast, quinoline was persistent under anaerobic condition; whereas, about 0.09 mM  
284 2-hydroxyquinoline accumulated and 0.13 mM quinoline remained if 0.2%  
285 oxygen supplied, which equal to 2.8 mg/L dissolved oxygen; quinoline was  
286 completely transformed into 2-hydroxyquinoline under 0.5% oxygen., which equal to  
287 7.1 mg/L dissolved oxygen; when the oxygen concentration increased to 0.8%, which  
288 equal to 11.2 mg/L dissolved oxygen, only 0.17 mM 2-hydroxyquinoline retained due  
289 to the further degradation (Fig. 4).

### 290 **Synergistic degradation of quinoline by a bacterial co-culture**

291 Since that *Thauera* sp. R2 has been proved as an anaerobic 2-hydroxyquinoline  
292 degrader and *Rhodococcus* sp. YF3 had the capacity for hydroxylation of quinoline,  
293 we assumed that the degradation of quinoline might be accomplished in the bioreactor  
294 via metabolic cooperation of these two bacteria. Thus, we performed a trial of  
295 co-cultivation using the above mentioned bacterial strains of *Thauera* and  
296 *Rhodococcus* to test the capacity of degradation of quinoline under the conditions of  
297 different oxygen-availability. We found that 0.07 mM and 0.01 mM quinoline  
298 remained in the vials of experimental groups of 0.2% O<sub>2</sub> and 0.5% O<sub>2</sub>, respectively.  
299 2-hydroxyquinoline was finally eliminated in all the groups within 48 h while  
300 quinoline was completely depleted only in 0.8% O<sub>2</sub> (Fig. 5a).

301 Considering the original bioreactor is still an oxygen deficient system, we try to  
302 elucidate the possible mechanism of anaerobic quinoline degradation. We have  
303 verified that *Rhodococcus* sp. YF3 could hydroxylate quinoline under micro-oxygen  
304 condition. Washing and transferring YF3 cells, which were pre-incubated with  
305 quinoline, 2-hydroxyquinoline or phenol for 24 h under 0.5% oxygen condition, to  
306 fresh MMQ medium and incubating for another 72 h under completely anaerobic  
307 condition, we observed that 0.23 mM quinoline was basically transformed into  
308 equivalent 2-hydroxyquinoline by YF3 monoculture. 2-Hydroxyquinoline was further  
309 removed in the co-culture of YF3 and R2 (Fig. 5b).

310

### 311 **Discussion**

312 In this study, we aimed to elucidate the microbial mechanism of quinoline  
313 denitrifying degradation. As a first step, we tried to isolate the most predominant  
314 bacteria in the quinoline-degrading consortium, which was considered as the  
315 promising anaerobic quinoline degrader. However, many attempts failed at isolating  
316 the target strain by using the media with quinoline as sole carbon source. In the earlier  
317 study, a *Thauera* genus-specific nested-PCR denaturing gradient gel electrophoresis  
318 (DGGE) method was developed, combining with media containing various carbon  
319 source, to guide the isolation of *Thauera* spp.. In that study, three *Thauera* strains (Q4,  
320 Q20-C, and 3-35) were obtained but none of them could utilize quinoline either  
321 aerobically or anaerobically (13,14). Considering that the former isolates were  
322 corresponding to the less abundant *Thauera* species in the bioreactor, in this study, we  
323 designed OTU specific PCR primers targeting the most predominant *Thauera* OTU1,  
324 as the biomarker to guide the isolation of the target *Thauera* bacterial strains. The  
325 colonies grown on various media were screened by using this method. As a result,  
326 four isolates belonged to *Thauera aminoaromatica*, were identified as the homologue  
327 of the most predominant bacteria in quinoline degrading bioreactor. *Thauera*  
328 *aminoaromatica* had been reported as one of denitrifying species capable of growing  
329 with amino-aromatic compounds (32). In this study, all isolates belonging to *Thauera*  
330 *aminoaromatica* were able to degrade 2-hydroxyquinoline but not quinoline under  
331 denitrifying conditions, which exactly explained previous unsuccessful attempts via  
332 the strategy of quinoline-degrading function-guiding isolation by using quinoline as  
333 the solo carbon source. Hence, sequence-guiding approach to assist isolating some  
334 difficult-to-culture bacteria could be an alternative and promising method.

335 Dozens literatures have reported that isolated bacteria may lack of the capability  
336 of complete mineralization of hydrocarbon, especially for the recalcitrant compounds  
337 (33). Moreover, regardless of present or absent of oxygen, the first metabolite of  
338 quinoline was 2-hydroxyquinoline (10). This compound was thus preferentially  
339 considered as substrate of most predominant *Thauera* bacteria in the denitrifying  
340 bioreactor. The results of 2-hydroxyquinoline degradation by monoculture of *Thauera*  
341 isolates in this study proved our hypothesis.

342 To further identify the bacteria being responsible for transforming quinoline to  
343 2-hydroxyquinoline, we further explored other key players from the predominant  
344 bacteria in the community. The members of genus *Rhodococcus* were known as  
345 aerobic quinoline degraders (8), and this phylotype has been reported closely related  
346 with quinoline denitrifying degradation (15, 16). Based on that, *Rhodococcus*  
347 *pyridinivorans* YF3 isolated from the bioreactor was considered as a candidate to  
348 initial attack for quinoline in the denitrifying bioreactor. Unsurprisingly, the  
349 experimental result was well in accord with our speculation. Notably, the  
350 consumption of quinoline by strain YF3 depended upon the oxygen concentrations.  
351 Therefore, long-term accessing to low oxygen likely shape a *Rhodococcus*-dominated  
352 community in the quinoline denitrifying bioreactor (15).

353 Communities of bacteria are extraordinarily complex with hundreds of interacting  
354 taxa but the knowledge about how the tangled interactions within natural bacterial  
355 communities mediate ecosystem functioning is limited (34). A promising way to  
356 surpass this limitation is to create a synthetic community by artificially co-culturing of  
357 selected two or more species under a well-defined media (35). Considering that the  
358 metabolite of quinoline transformed by isolate YF3 could be further metabolized by  
359 isolate R2, we constructed a synthetic consortium using pure cultures of these two  
360 isolates to achieve cooperative degradation of quinoline. In this consortium, *Thauera*  
361 *sp.* R2 cross-feed on the 2-hydroxyquinoline released by *Rhodococcus sp.* YF3.  
362 Ecologically, this type of microbial interaction is equivalent to a commensalism (36).  
363 Here the initial step of quinoline degradation is hydroxylation at the 2 position which  
364 requires energy (37), but not provides any substrate and energy for growth.  
365 Accordingly, *Rhodococcus sp.* YF3 would not benefit from the hydroxylation reaction.  
366 In this study, the product 2-hydroxyquinoline of the first transformation step served as  
367 the substrate for the next organism in the chain. Meanwhile, *Thauera sp.* R2 released  
368 some intermediates during further metabolism. And the bacteria of *Rhodococcus sp.*  
369 YF3 could utilize these metabolites leaked from *Thauera* cells to obtain energy and  
370 for growth. Consequently, most of the carbon from quinoline was consumed by R2  
371 cells and small portion by YF3 and other bacteria. It was well consistent with the

372 highest abundance of *Thauera* sp. R2 and relatively lower abundance of *Rhodococcus*  
373 sp. YF3 in the bioreactor, although the latter acted like a lord to open the food box for  
374 *Thauera* R2. Thus, the cross-feeding and interdependence between these two strains  
375 was main driven force for quinoline denitrifying degradation and assembly for a  
376 stable community in the denitrifying bioreactor. We summarized the ecological  
377 mechanism of quinoline denitrifying degradation in Figure 6.

378 Moreover, it was worth considering why this multi-strain degradation occurred in  
379 the quinoline-degrading reactor. In previous research (38), main reactions with respect  
380 to starch biodegradation occurred at the lower part of reactor while the small  
381 molecules such as acetate were converted to methane at the upper part. The organic  
382 compounds were gradually attenuated along the upflow direction. It was speculated  
383 that in our closed reactor, during the synthetic wastewater upflowing (i.e. from the  
384 bottom to up), the dissolved oxygen coming with the synthetic wastewater (ca. 7 mg/L  
385 dissolved oxygen) was rapidly consumed by *Rhodococcus* and other aerobic bacteria  
386 in the bottom of reactor, which then made an anoxic denitrifying niche in the inner  
387 space of bioreactor for *Thauera* to degrade 2-hydroxyquinoline that was produced by  
388 hydroxylation via *Rhodococcus* activity under limited oxygen or anoxic condition.

389 Metabolic cooperation between/among different bacterial members in the  
390 community are beneficial to the competitiveness. For instance, it has been shown that  
391 degradation of 4-chlorodibenzofuran by *Sphingomonas* sp. RW1 results in the  
392 accumulation of a dead-end product 3,5-dichlorosalicylate, while the inoculation with  
393 *Burkholderia* sp. JWS enables the cooperative complete degradation (39). A  
394 consortium comprised of *Escherichia coli* SD2 and *Pseudomonas putida* KT2440  
395 pSB337 efficiently degrades parathion without accumulation of toxic intermediates  
396 (40). Besides, it has also been reported that four members were actively involved in  
397 the degradation of 4-chlorosalicylate, in which the strain of MT4 alleviated the stress  
398 of MT1 by transforming the toxic intermediate protoanemonin (41). These examples  
399 indicated that the metabolic complementarity in the microbial community were in  
400 favor of efficient bioremediation to contaminants and also benefited for the better  
401 adaptation or survival of bacteria in the specific environment.



402 This study collectively discussed commensal interaction in a quinoline-degrading  
403 consortium, aiming at highlighting importance of cross-feeding relationship  
404 between/among bacteria in biodegradation of organic compounds in the environment.  
405 Although our knowledge of this commensal relationship is not yet complete,  
406 understanding of such complex microbial interaction would provide useful  
407 information for assessing the biodegradability of organic compounds in the natural  
408 environment, for instance, the quinoline denitrifying degradation. Here we provided  
409 an unexpected and amazing insight into the microbial interaction. *Thauera*  
410 *aminoaromatica* R2, which adapted to denitrifying niche, could cooperate with  
411 *Rhodococcus pyridinivorans* YF3 to form a cross-feeding guild. To our best  
412 knowledge, this is the first report on cooperative relationship in quinoline denitrifying  
413 degrading guild, where two cross-feeding bacterial strains cooperated to degrade  
414 quinoline. However, the key bacteria, which open the food box for quinoline  
415 degradation, did not directly benefit from the hydroxylation under limited oxygen  
416 condition.

## 417 **Acknowledgment**

418 This work was supported by the National Natural Science Foundation of China  
419 (NSFC 31670105 and NSFC 21177086).

420

## 421 **References**

- 422 1. Reineke AK, Göen T, Preiss A, Hollender J. 2007. Quinoline, derivatives at a tar oil  
423 contaminated site: hydroxylated products as indicator for natural attenuation? *Environmental*  
424 *Science & Technology*, 41(15):5314.
- 425 2. Hirao K, Shinohara Y, Tsuda H, Fukushima S, Takahashi M. 1976. Carcinogenic activity of  
426 quinoline on rat liver. *Cancer Research*, 36(2 Pt 1):329.
- 427 3. Nagao M, Yahagi T, Seino Y, Sugimura T, Ito N. 1977. Mutagenicities of quinoline and its  
428 derivatives. *Mutation Research*, 42(3):335-341.
- 429 4. Ramirez I, Volcke EIP, Rajinikanth R, Steyer JP. 2009. Modeling microbial diversity in  
430 anaerobic digestion through an extended ADM1 model. *Water Research*, 43:2787-2800.



- 431 5. Sun Q, Bai Y, Zhao C, Xiao Y, Wen D, Tang X. 2009. Aerobic biodegradation  
432 characteristics and metabolic products of quinoline by a *Pseudomonas* strain. *Bioresource*  
433 *Technology*, 100(21): 5030-5036.
- 434 6. Bai Y, Sun Q, Zhao C, Wen D, Tang X. 2010. Quinoline biodegradation and its nitrogen  
435 transformation pathway by a *Pseudomonas* sp. strain. *Biodegradation*, 21(3):335-344.
- 436 7. Qiao L, Wang J. 2010. Biodegradation characteristics of quinoline by *Pseudomonas*  
437 *putida*. *Bioresource Technology*, 101(19):7683-7686.
- 438 8. Zhu S, Liu Q, Fan L, Ni J. 2008. Degradation of quinoline by *Rhodococcus* sp. QL2 isolated  
439 from activated sludge. *Journal of Hazardous Materials*, 160(2-3):289-294.
- 440 9. Tuo B, Yan J, Fan B, Yang Z, Liu J. 2012. Biodegradation characteristics and  
441 bioaugmentation potential of a novel quinoline-degrading strain of *Bacillus* sp. isolated from  
442 petroleum-contaminated soil. *Bioresource Technology*, 107(3):55-60.
- 443 10. Felczak A, Zawadzka K, Lisowska K. 2014. Efficient biodegradation of quinoline – Factors  
444 determining the process. *International Biodeterioration & Biodegradation* 96 127-134.
- 445 11. Li Y, Wang L, Liao L, Sun L, Zheng G, Luan J, Gu G. 2010. Nitrate-dependent  
446 biodegradation of quinoline, isoquinoline, and 2-methylquinoline by acclimated activated  
447 sludge. *J Hazard Mater*. 173(1-3), 151-158. doi: 10.1016/j.jhazmat.2009.08.061.
- 448 12. Bai Y, Sun Q, Xing R, Wen D, Tang X. 2011. Analysis of denitrifier community in a  
449 bioaugmented sequencing batch reactor for the treatment of coking wastewater containing  
450 pyridine and quinoline. *Appl Microbiol Biotechnol*. 90(4), 1485-1492. doi:  
451 10.1007/s00253-011-3139-0.
- 452 13. Mao Y, Zhang X, Yan X, Liu B, Zhao L. 2008. Development of group-specific PCR-DGGE  
453 fingerprinting for monitoring structural changes of *Thauera* spp. in an industrial wastewater  
454 treatment plant responding to operational perturbations. *J Microbiol Methods* 75(2), 231-236.
- 455 14. Mao Y, Zhang X, Xia X, Zhong H, Zhao L. 2010. Versatile aromatic compound-degrading  
456 capacity and microdiversity of *Thauera* strains isolated from a coking wastewater treatment  
457 bioreactor. *J Ind Microbiol Biotechnol* 37(9), 927-934.
- 458 15. Zhang X, Yue S, Zhong H, Hua W, Chen R, Cao Y, Zhao L. 2011. A diverse bacterial community  
459 in an anoxic quinoline-degrading bioreactor determined by using pyrosequencing and clone  
460 library analysis. *Appl Microbiol Biotechnol* 91(2), 425-434.
- 461 16. Wang Y, Tian H, Huang F, Long W, Zhang Q, Wang J, Zhu Y, Wu X, Chen G, Zhao L,  
462 Bakken LR, Frostegård Å, Zhang X. 2017. Time-resolved analysis of a denitrifying bacterial  
463 community revealed a core microbiome responsible for the anaerobic degradation of  
464 quinoline. *Scientific Reports*, 7(1), 14778.
- 465 17. Licht D, Johansen SS, Arvin E, Ahring BK. 1997. Transformation of indole and quinoline by  
466 *Desulfobacterium indolicum* (DSM 3383). *Applied Microbiology & Biotechnology* 47(2)  
467 167-172.
- 468 18. Liu B, Zhang F, Feng X, Liu Y, Yan X, Zhang X, Wang L, Zhao L. 2006. *Thauera* and  
469 *Azoarcus* as functionally important genera in a denitrifying quinoline-removal bioreactor as  
470 revealed by microbial community structure comparison. *FEMS Microbiol Ecol* 55(2)  
471 274-286.
- 472 19. Paulin MM, Nicolaisen MH, Jacobsen CS, Gimsing AL, Sørensen J, Bælum J. 2013.  
473 Improving Griffith's protocol for co-extraction of microbial DNA and RNA in adsorptive  
474 soils. *Soil Biol. Biochem.* 63 37-49.

- 475 20. Zhang Q, Wu Y, Wang J, Wu G, Long W, Xue Z, Wang L, Zhang X, Pang X, Zhao Y, Zhao L,  
476 Zhang C. 2016. Accelerated dysbiosis of gut microbiota during aggravation of DSS-induced  
477 colitis by a butyrate-producing bacterium. *Sci. Rep.* 6: 27572.
- 478 21. Edgar RC. 2013. UPARSE: highly accurate OTU sequences from microbial amplicon reads.  
479 *Nat. Methods* 10:996-1000.
- 480 22. Edgar RC, Haas BJ, Clemente JC, Quince C and Knight R. 2011. UCHIME improves  
481 sensitivity and speed of chimera detection. *Bioinformatics* 27:2194-2200.
- 482 23. Cole JR, Wang Q, Fish JA, Chai BL, McGarrell DM, Sun YN, Brown CT, Porras-Alfaro A,  
483 Kuske CR, Tiedje JM. 2014. Ribosomal database project: data and tools for high throughput  
484 rRNA analysis. *Nucleic Acids Res.* 42 633-642.
- 485 24. Edgar RC. 2010. Search and clustering orders of magnitude faster than BLAST.  
486 *Bioinformatics* 26:2460-2461.
- 487 25. Caporaso JG, Kuczynski J, Stombaugh J, Bittinger K, Bushman FD, Costello EK, Fierer N,  
488 Peña AG, Goodrich JK, Gordon JI, Huttley GA, Kelley ST, Knights D, Koenig JE, Ley RE,  
489 Lozupone CA, McDonald D, Muegge BD, Pirrung M, Reeder J, Sevinsky JR, Turnbaugh PJ,  
490 Walters WA, Widmann J, Yatsunenkov T, Zaneveld J, Knight R. 2010. QIIME allows analysis  
491 of high-throughput community sequencing data. *Nat Methods* 7:335-336.
- 492 26. Kiyohara H, Nagao K, Yana K. 1982. Rapid screen for bacteria degrading  
493 water-insoluble, solid hydrocarbons on agar plates. *Appl Environ Microbiol.*  
494 43(2):454-7.
- 495 27. Van der Linde K, Lim BT, Rondeel JMM. 1999. Improved bacteriological surveillance of  
496 haemodialysis fluids: a comparison between tryptic soy agar and reasoner's 2A media.  
497 *Nephrology Dialysis Transplantation* 14(10): 2433-2437.
- 498 28. Renshaw MA, Olds BP, Jerde CL, Mcveigh MM and Lodge DM. 2015. The room  
499 temperature preservation of filtered environmental DNA samples and assimilation into a  
500 phenol-chloroform-isoamyl alcohol DNADNA extraction. *Molecular Ecology Resources,*  
501 15(1):168-176.
- 502 29. Wei G, Pan L, Du H, Chen J, Zhao L. 2004. ERIC-PCR fingerprinting-based community  
503 DNA hybridization to pinpoint genome-specific fragments as molecular markers to identify  
504 and track populations common to healthy human guts. *J Microb Method* 59(1):91-108.
- 505 30. Wu G, Zhang M, Wei C, Wang Y, Yao X, Zhao L, Zhang X. 2016. Draft genome sequence of  
506 *Thauera* sp. DTG from a denitrifying quinoline degrading microbial consortium. *Applied*  
507 *Environ Biotech* 1(1): 38-43.
- 508 31. Johansen SS, Arvin E, MosbaK H and Hansen AB. 1997. Degradation pathway of quinolines  
509 in a biofilm system under denitrifying conditions. *Environ Toxicol Chem* 16(9):1821-1828.
- 510 32. Mechichi TE, Stackebrandt E, Gad'on N, Fuchs G. 2002. Phylogenetic and metabolic  
511 diversity of bacteria degrading aromatic compounds under denitrifying conditions and  
512 description of *Thauera phenylacetica* sp. nov. *Thauera aminoaromatica* sp. nov. and  
513 *Azoarcus buckelii* sp. nov. *Arch Microbiol* 178(1):26-35.
- 514 33. Bunge M, Lechner U. 2009. Anaerobic reductive dehalogenation of polychlorinated dioxins.  
515 *Appl Microb Biotech* 84(3): 429-444.
- 516 34. Rivett DW, Bell T. 2018. Abundance determines the functional role of bacterial phylotypes in  
517 complex communities. *Nat Microbiol* 3(7): 767-772.
- 518 35. Großkopf T, Soyer OS. 2014. Synthetic microbial communities. *Current Opinion in*

- 519 Microbiology 18(4): 72-77.
- 520 36. Holton G. 1977. Sociobiology: the new synthesis? Newsletter on Science Technology &  
521 Human Values 46(21):28-43.
- 522 37. Godsy EM, Goerlitz DF, Grbic-Galic D. 1992. Methanogenic biodegradation of e Ground  
523 Water 20: 232-242.
- 524 38. Lu X, Zhen G, Estrada AL, Chen M, Ni J, Hojo T. 2015. Operation performance and granule  
525 characterization of upflow anaerobic sludge blanket (UASB) reactor treating wastewater with  
526 starch as the sole carbon source. Bioresour Technol. 180: 264-273.
- 527 39. Arfmann H, Timmis KN, Wittich R. 1997. Mineralization of 4-chlorodibenzofuran by a  
528 consortium consisting of *sphingomonas* sp. strain RW1 and *Burkholderia* sp. strain  
529 JWS. Appl Environ Microbiol 63(9): 3458-62.
- 530 40. Gilbert ES, Walker AW, Keasling JD. 2003. A constructed microbial consortium for  
531 biodegradation of the organophosphorus insecticide parathion. Appl Microb Biotech 61(1):  
532 77-81.
- 533 41. Pelz O, Tesar M, Wittich RM, Moore ERB, Timmis KN, Abraham WR. 1999. Towards  
534 elucidation of microbial community metabolic pathways: unravelling the network of carbon  
535 sharing in a pollutant- - degrading bacterial consortium by immunocapture and isotopic ratio  
536 mass spectrometry. Environ Microbiol 1(2):167-174.

## 537 **Figure legends**

538 **Figure 1.** The abundance of six most predominant OTUs among 460 OTUs from the  
539 quinoline-degrading bioreactor.

540

541 **Figure 2.** Phylogenetic tree based on the 16S rRNA gene sequences of isolates from quinoline  
542 degrading bioreactor and other related *Thauera* species from NCBI database. Numbers in bracket  
543 are the sequences accession number in GenBank. The bootstrap values of Neighbor-Joining  
544 analysis were labeled at the nodes. Diamond label means isolates in this study; square label means  
545 isolates from same reactor in previous study.

546

547 **Figure 3.** Dynamics of 2-hydroxyquinoline (2-OH-Q) and nitrate removal by four *Thauera* strains.  
548 a) degradation of 50 mg/L 2-OH-Q and 1mM nitrate degradation; b) the performance of 30 mg/L  
549 2-OH-Q degradation under different pH conditions. SC represents the sterile control.

550

551 **Figure 4.** Transformation of quinoline by *Rhodococcus pyridinivorans* YF3 under different  
552 oxygen availability a) Concentration of quinoline and 2-hydroxyquinoline (2-OH-Q); b) The  
553 proportion of different components remained in cultures.

554

555 **Figure 5.** Dynamics of quinoline degradation by the co-culture of *Rhodococcus* sp. YF3 and  
556 *Thauera* sp. R2. a) under limited oxygen supplement with the inoculum cultured in NB medium;  
557 different colors represent different oxygen supplied conditions. b) under anaerobic condition with  
558 the inoculum precultured aerobically in medium containing quinoline. Blue line represents  
559 *Rhodococcus* sp. YF3 alone, while red line represents co-culture of *Rhodococcus* sp. YF3 and  
560 *Thauera* sp. R2. Solid line in a) and b) represents the change of quinoline concentration while the  
561 dotted line represent the change of 2-hydroxyquinoline (2-OH-Q) concentration.

562

563 **Figure 6.** Proposed model for a syntrophic degradation of quinoline by *Rhodococcus* sp. YF3 and  
564 *Thauera* sp. R2.

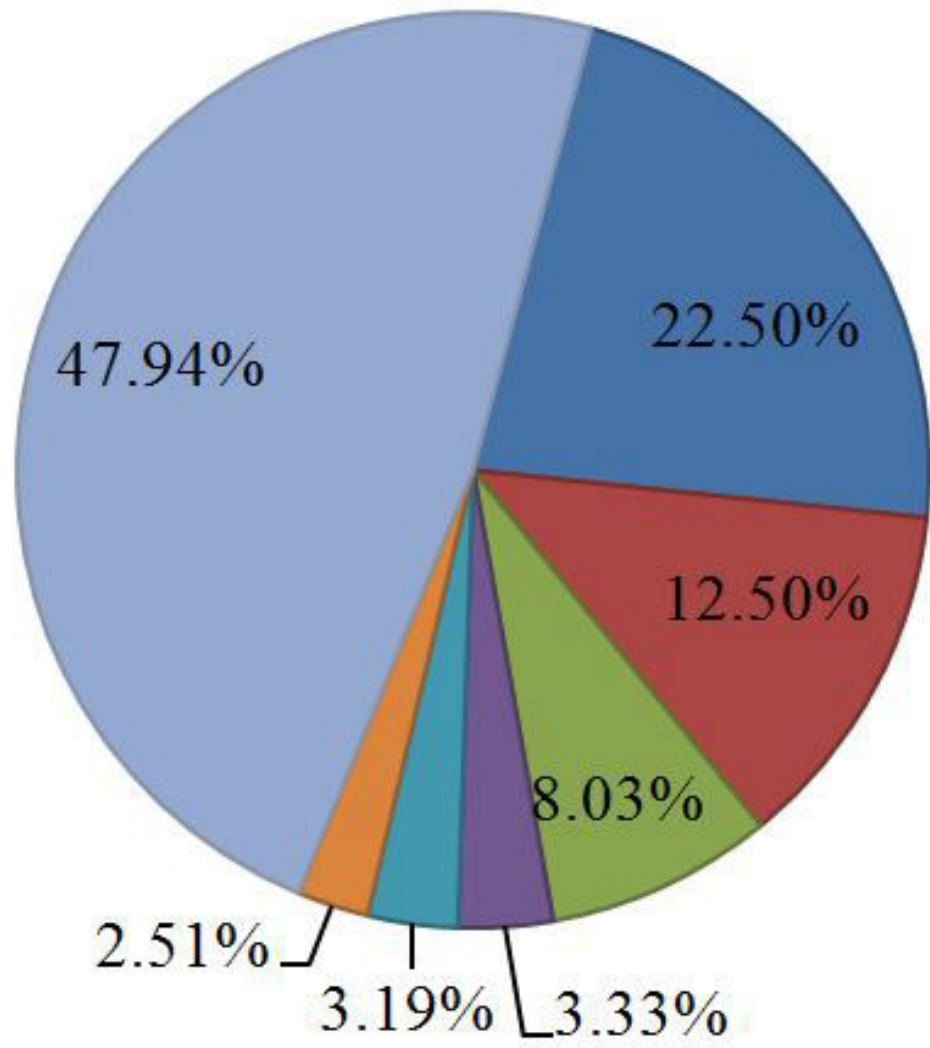

- OTU1 (*Thauera*)
- OTU2 (*Rhodococcus*)
- OTU3 (unclassified)
- OTU4 (unclassified)
- OTU5 (*Flavobacterium*)
- OTU6 (*Rhodococcus*)
- Other 454 OTUs

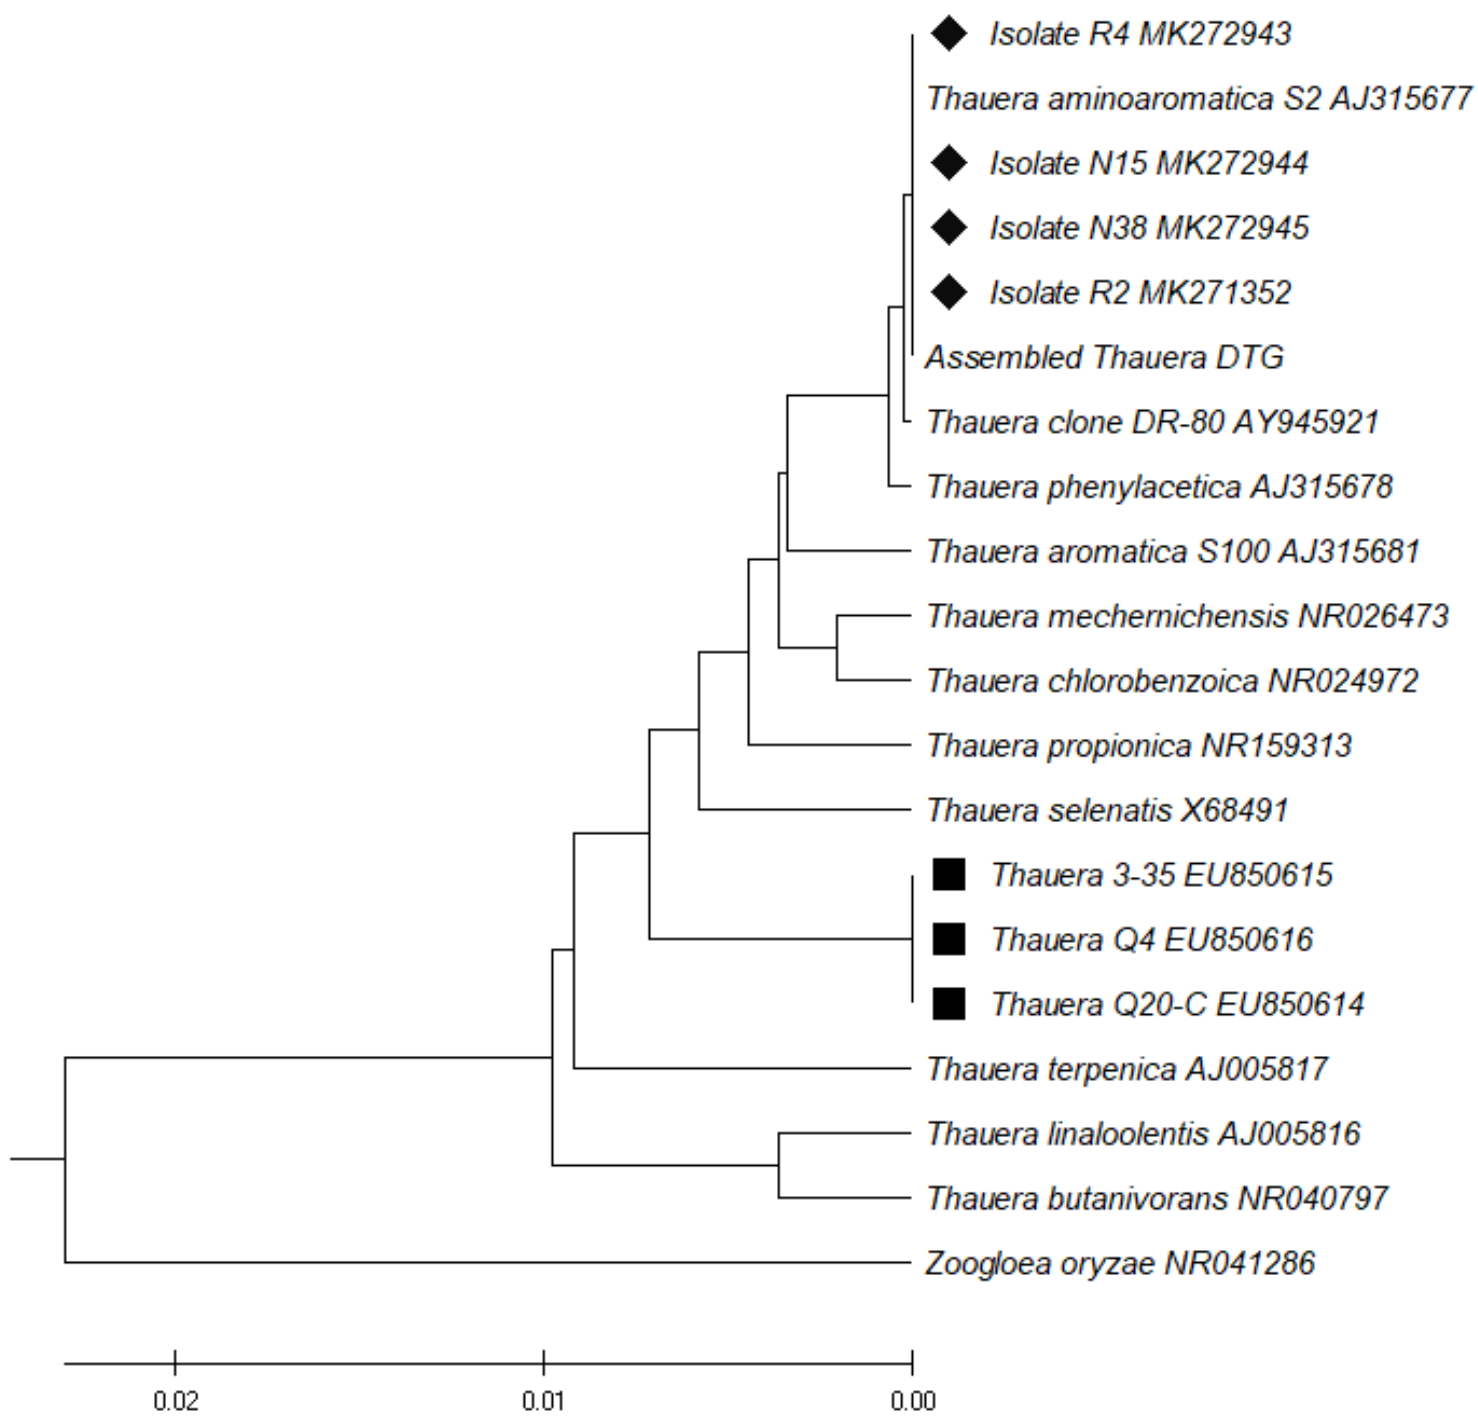

a)

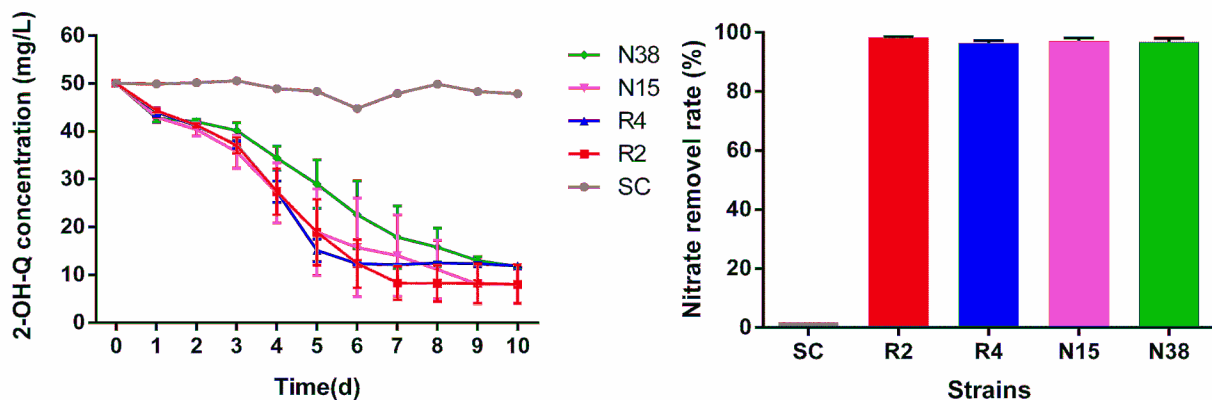

b)

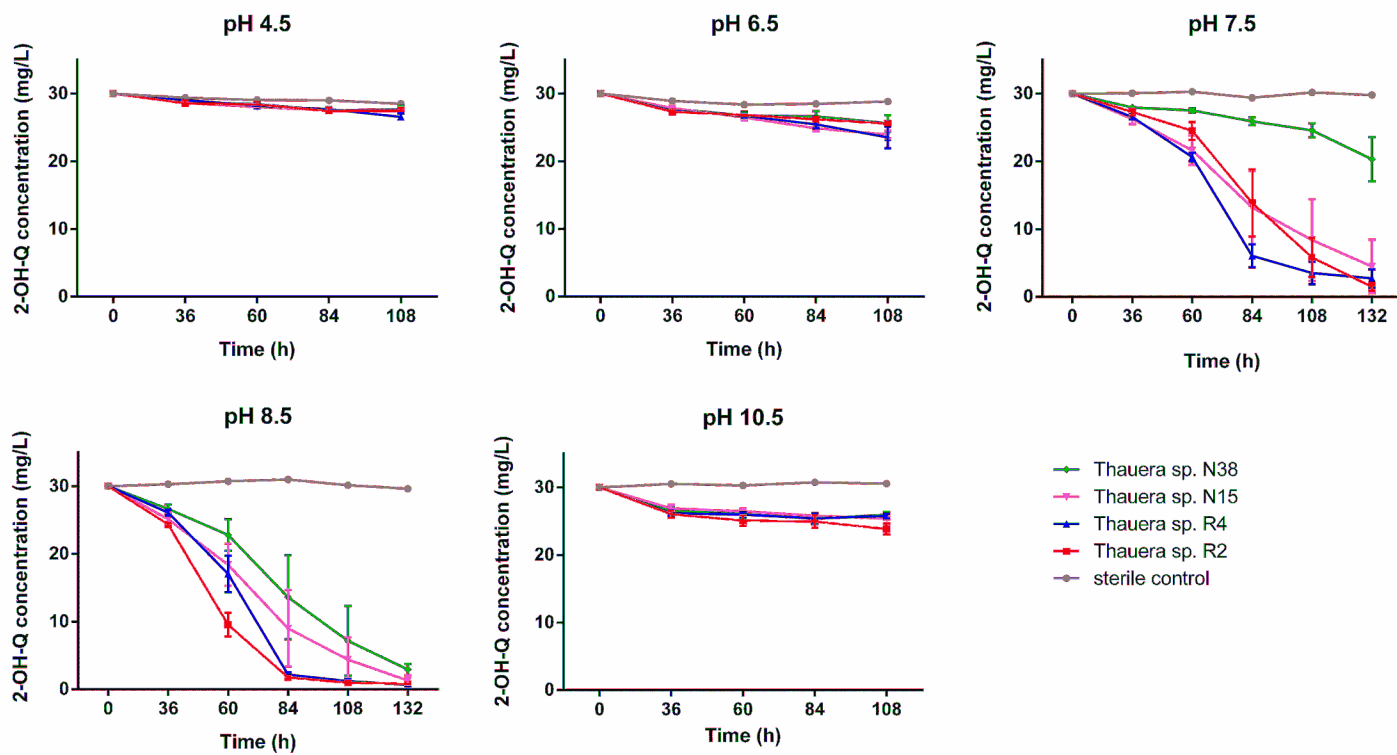



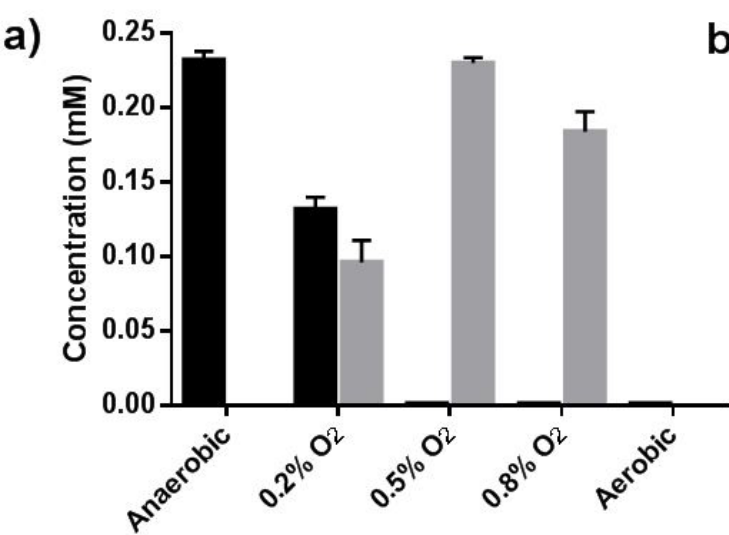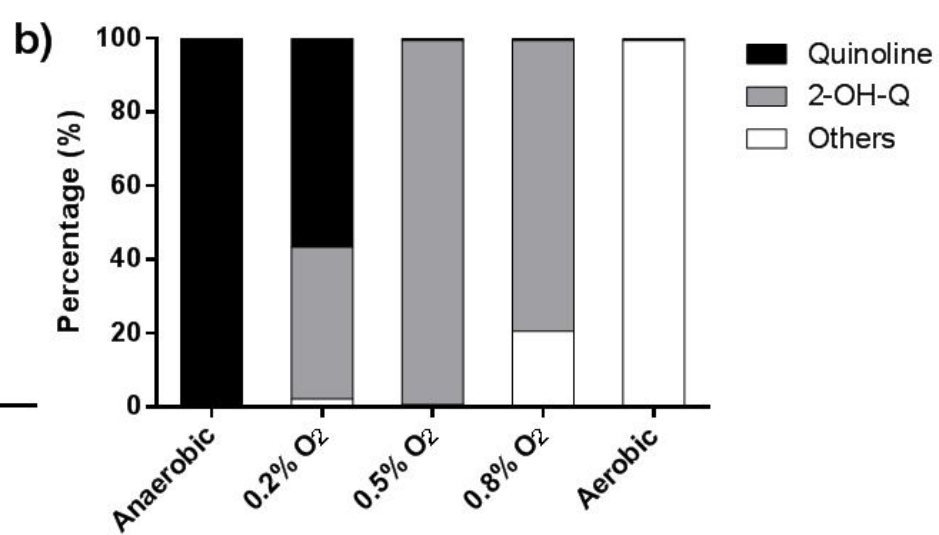

a)

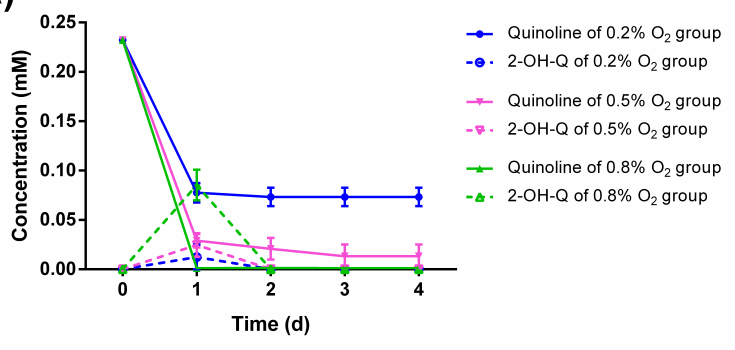

b)

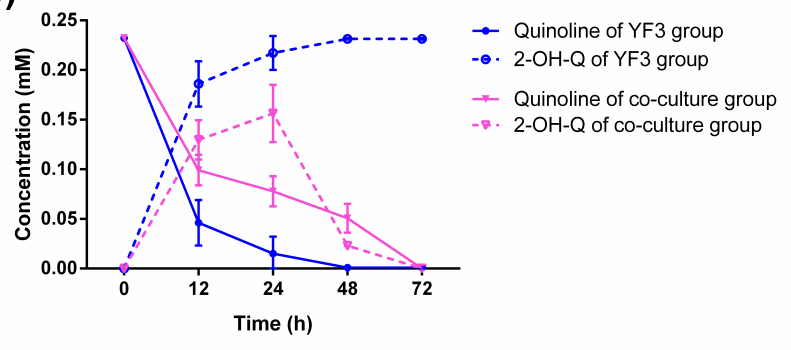

**Quinoline**

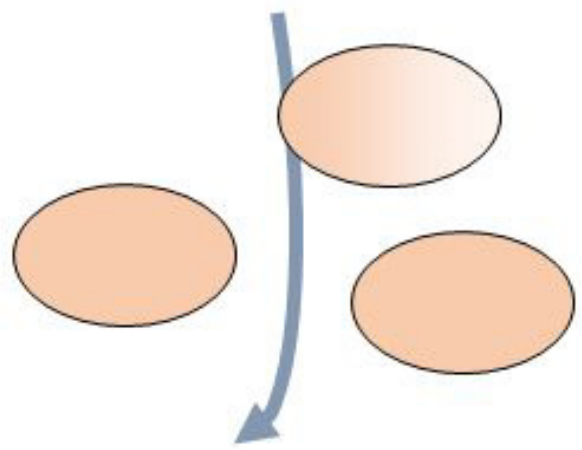

*Rhodococcus* sp. YF3

Aerobic—low oxygen

**2-OH-Q**

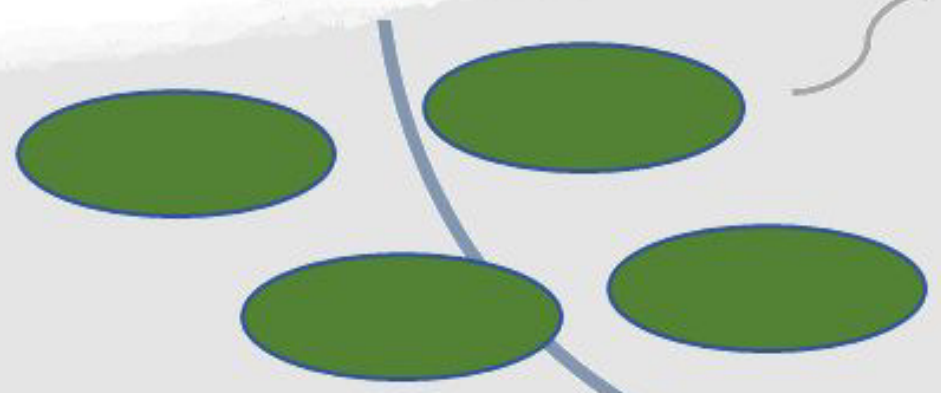

Intermediate metabolites

Anaerobic

*Thauera aminoaromatica* R2

$\text{NH}_4^+/\text{NH}_3, \text{CO}_2$

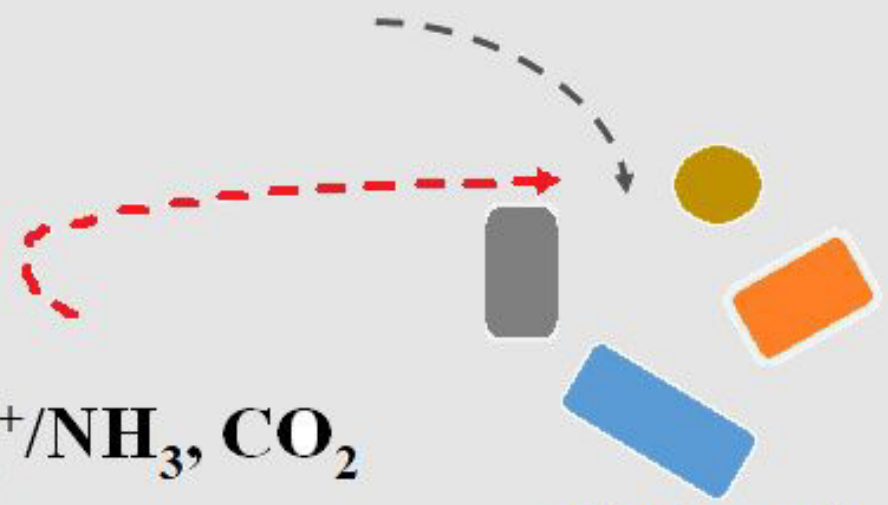

other bacteria
